# Supplementary material
Source: PubMed Central journal article supplement (PMC4579426)
Supplement: AEM.02222-15_zam999116628so1.pdf [file AEM.02222-15_zam999116628so1.pdf]

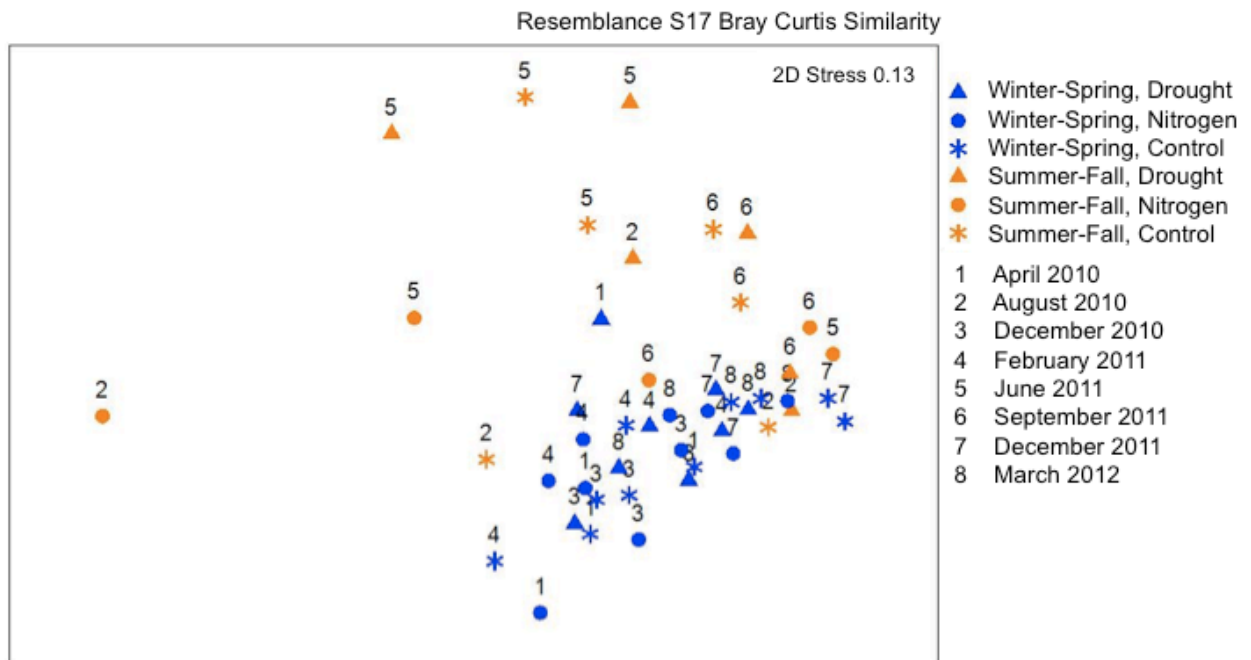

**FIG S1** Example of a non-metric multidimensional scaling (NMDS) ordination based on Bray Curtis similarities for bacterial/archaeal community composition for the assimilatory nitrite to ammonia pathway. Sample collection date is represented by number. The symbols shapes represent plot treatment: ambient conditions (star), drought (triangle), or nitrogen addition (circle). The symbol color denotes winter-spring (blue) or summer-fall (orange) seasons.

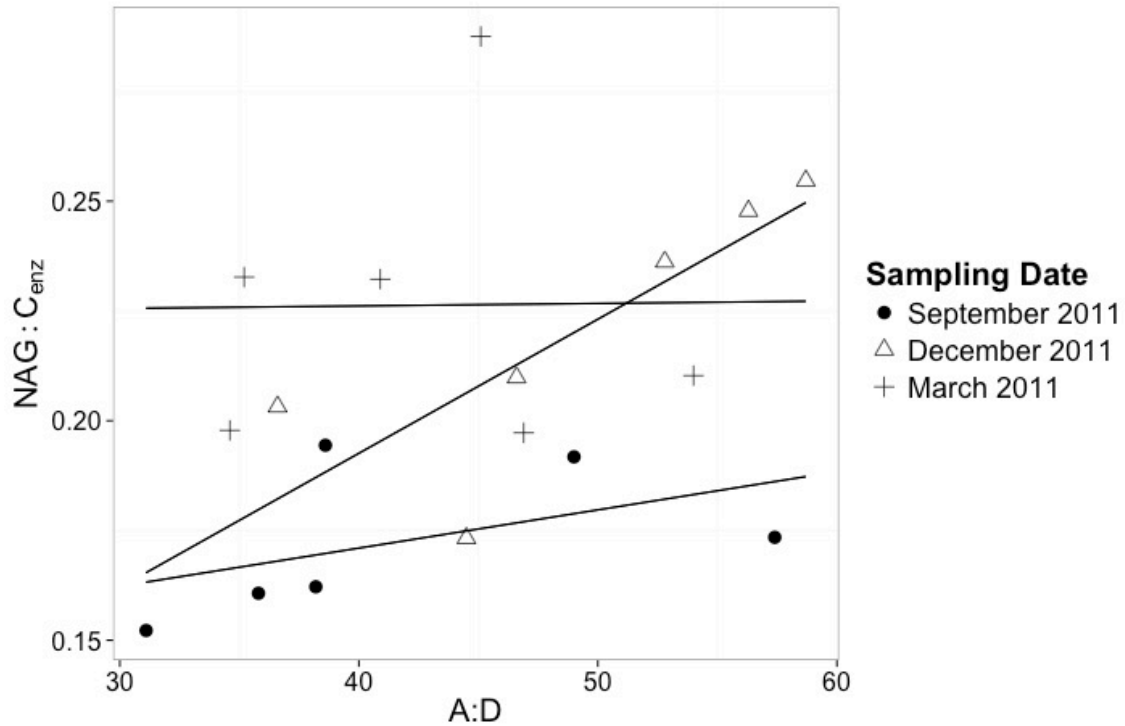

**FIG S2** A:D ratio (x-axis) and NAG:Cenz ratio (y-axis). Symbols represent sampling date. The ratio of A:D abundance explained almost half the variation in NAG:Cenz (ANCOVA;  $p=0.045$ ; adjusted  $R^2=0.47$ ). The covariate time (sampling date), was also significant ( $p=0.004$ ), but there was no A:D by time interaction ( $p=0.88$ ).

**TABLE S1** MG-RAST accession numbers for the plant litter metagenomes used in this study.

| <b><u>Sampling Date</u></b> | <b><u>Treatment</u></b> |                |                          |
|-----------------------------|-------------------------|----------------|--------------------------|
|                             | <b>Control</b>          | <b>Drought</b> | <b>Nitrogen Addition</b> |
| April 2010                  | 4511049                 | 4511045        | 4511047                  |
|                             | 4511050                 | 4511046        | 4511048                  |
| August 2010                 | 4511065                 | 4511061        | 4511063                  |
|                             | 4511060                 | 4511062        | 4511064                  |
| December 2010               | 4511116                 | 4511112        | 4511114                  |
|                             | 4511111                 | 4511113        | 4511115                  |
| February 2011               | 4511140                 | 4511137        | 4511139                  |
|                             | 4511141                 | 4511134        | 4511135                  |
| June 2011                   | 4511146                 | 4511142        | 4511144                  |
|                             | 4511147                 | 4511143        | 4511145                  |
| September 2011              | 4511153                 | 4511148        | 4511152                  |
|                             | 4511151                 | 4511149        | 4511150                  |
| December 2011               | 4511184                 | 4511182        | 4511183                  |
|                             | 4511185                 | 4511179        | 4511180                  |
| March 2012                  | 4511191                 | 4511193        | 4511189                  |
|                             | 4511192                 | 4511188        | 4511190                  |

**TABLE S2** Nitrogen cycling pathways, number of genes, the genes searched in the pathways and KEGG identification. Denitrification and nitrogen fixation pathways are a combination SEED (1) and KEGG (2) database classifications. All other pathways were classified using the FOAM database (3).

| <b>N- cycle pathway</b>          | <b># of genes</b> | <b>genes</b>                                                                                                                                                                                                                                                                                                                                                           | <b>KEGG ID</b>                                                                                                                 |
|----------------------------------|-------------------|------------------------------------------------------------------------------------------------------------------------------------------------------------------------------------------------------------------------------------------------------------------------------------------------------------------------------------------------------------------------|--------------------------------------------------------------------------------------------------------------------------------|
| Ammonia assimilation             | 10                | glutamine synthase (ferredoxin), glutamate dehydrogenase (gdhA), glutamate synthase (NADPH/NADH) large chain (gltB), glutamate synthase (NADPH/NADH) small chain (gltD), glutamin asparaginase (aspQ), glutamine synthetase (glnA), glutamate synthase (GLT1), glutamate dehydrogenase (GLUDI_2), glutamate dehydrogenase (gudB, rocG), glutamate dehydrogenase (GDH2) | K00265<br>K01425<br>K00284<br>K01953<br>K00261<br>K15371<br>K00266<br>K00260<br>K00264<br>K05597<br>K00262<br>K01915           |
| Nitrification                    | 2                 | ammonia monooxygenase (amo), hydroxylamine oxidase (hoa)                                                                                                                                                                                                                                                                                                               | K10945<br>K10944<br>K10535<br>K10946                                                                                           |
| Dissimilatory Nitrate to Nitrite | 9                 | nitrate reductase delta subunit (narJ), nitrate reductase gamma subunit (narI), nitrate reductase alpha subunit (narG), nitrate reductase beta subunit (narH), periplasmic nitrate reductase (napA), rieske iron-sulfur protein (narB), nitrate reductase catalytic subunit (nasA), cytochrome b-561 (narC), cytochrome c-type protein (napB)                          | K00373<br>K08346<br>K00374<br>K00370<br>K08361<br>K00371<br>K08347<br>K02567<br>K15878<br>K00372<br>K08345<br>K15879<br>K02568 |
| Dissimilatory Nitrite to Ammonia | 4                 | nitrite reductase cytochrome c-552 (nrfA), protein nrfD (nrfD), nitrite reductase protein NrfC (nrfC), cytochrome c-type protein (NrfB)                                                                                                                                                                                                                                | K04014<br>K03385<br>K04013<br>K04015                                                                                           |
| Assimilatory Nitrate to Nitrite  | 2                 | assimilatory nitrate reductase electron transfer subunit (nasB), nitrate reductase (NAD(P)H) (NR)                                                                                                                                                                                                                                                                      | K00360<br>K15875<br>K10534                                                                                                     |

|                                 |    |                                                                                                                                                                                                                                                                                                                                                                                                                                                                                                                                                                                                                                                                                                                                                                                                                                                                                                                                                                                                                                                                                        |                                                |
|---------------------------------|----|----------------------------------------------------------------------------------------------------------------------------------------------------------------------------------------------------------------------------------------------------------------------------------------------------------------------------------------------------------------------------------------------------------------------------------------------------------------------------------------------------------------------------------------------------------------------------------------------------------------------------------------------------------------------------------------------------------------------------------------------------------------------------------------------------------------------------------------------------------------------------------------------------------------------------------------------------------------------------------------------------------------------------------------------------------------------------------------|------------------------------------------------|
| Assimilatory Nitrite to Ammonia | 3  | ferredoxin-nitrite reductase(nirA), nitrite reductase (NADH) large subunit (nirB), nitrite reductase (NADH) small subunit (nirD)                                                                                                                                                                                                                                                                                                                                                                                                                                                                                                                                                                                                                                                                                                                                                                                                                                                                                                                                                       | K00366<br>K00362<br>K00363                     |
| Denitrification                 | 20 | Cytochrome cd1 nitrite reductase (nirS), Copper-containing nitrite reductase (nirK), Nitrite reductase accessory protein (NirV), Nitric-oxide reductase quinol-dependent (qNor), Nitric-oxide reductase subunit B (cNor-B), Nitric-oxide reductase subunit C (cNor-C), Nitric oxide reductase activation protein (NorE), Nitric oxide reductase activation protein (NorD), Nitric oxide reductase activation protein (NorQ), Nitrous-oxide reductase (nosZ), Nitrous oxide reductase maturation protein (NosD), Nitrous oxide reductase maturation protein-ATPase (NosF), Nitrous oxide reductase maturation transmembrane protein (NosY), Nitrous oxide reductase maturation protein, outer-membrane lipoprotein (NosL), Nitrous oxide reductase maturation periplasmic protein (NosX), Nitrous oxide reductase maturation protein (NosR), NnrS protein involved in response to NO (NnrS), Nitric oxide-responding transcriptional regulator-Crp/Fnr family (NnrR), Nitric oxide-responding transcriptional regulator Dnr-Crp/Fnr family (DNR), fungal nitric oxide reductase (CYP55) | K00376<br>K04561<br>K02305<br>K15864<br>K00368 |
| Nitrogen Fixation               | 20 | nitrogenase reductase (nifH), nitrogenase molybdenum-iron protein subunit alpha (nifD), nitrogenase molybdenum-iron protein subunit beta (nifK),nitrogenase vanadium-iron protein delta chain (vnfG), oxidoreductase/nitrogenase- component 1, vanadium nitrogenase beta subunit (vnfK), vanadium nitrogenase, alpha subunit (vnfD), Fe-only nitrogenase- beta subunit (anfK), Fe-only nitrogenase- delta subunit (anfG), nitrogenase iron-iron protein- alpha chain (anfD), nitrogenase molybdenum-iron cofactor biosynthesis protein (nifN), nitrogenase iron protein 2 (nifH2), nitrogenase molybdenum-cofactor biosynthesis protein (nifE), two-component regulatory system (ntrX), two-component regulatory system (ntrY), homocitrate synthase (nifV), cysteine                                                                                                                                                                                                                                                                                                                  | K02591<br>K02595<br>K00531<br>K02588<br>K02586 |

---

desulfurase (nifS), regulatory protein  
 (fixJ), nitrogen regulation protein NR(I  
 )(ntrC), regulatory protein (nifN/fixK)

**Table S3** Effect of treatment, time, and their interaction on bacterial composition (order level) for each N cycle pathway. Values are p values. NS is not significant.

| <b>N Cycle Pathway</b>           | <b>Treatment</b> | <b>Time</b> | <b>Treatment x Time</b> |
|----------------------------------|------------------|-------------|-------------------------|
| Dissimilatory Nitrate to Nitrite | P<0.01           | P<0.001     | P<0.01                  |
| Dissimilatory Nitrite to Ammonia | NS               | NS          | NS                      |
| Denitrification                  | NS               | P<0.01      | P<0.05                  |
| Nitrification                    | NS               | NS          | NS                      |
| Assimilatory Nitrate to Nitrite  | NS               | P<0.05      | NS                      |
| Assimilatory Nitrite to Ammonia  | P<0.05           | P<.001      | p=0.065                 |
| Ammonia Assimilation             | NS               | P<.001      | NS                      |
| Nitrogen Fixation                | NS               | NS          | NS                      |

**Table S4** Results of SIMPER analysis displaying the top five orders that contributed most to changes in composition for each pathway. The + sign indicates a higher relative abundance. Percent contribution is based on bray-curtis similarity.

| <b>Assimilatory Nitrite to Ammonia</b>  |               |             |                |
|-----------------------------------------|---------------|-------------|----------------|
| Order                                   | Winter-Spring | Summer-Fall | % Contribution |
| Actinomycetales                         | +             |             | 20.4           |
| Enterobacteriales                       |               | +           | 17.7           |
| Burkholderiales                         | +             |             | 11.3           |
| Sphingomonadales                        | +             |             | 10.16          |
| Rhizobiales                             | +             |             | 8.63           |
| <b>Dissimilatory Nitrate to Nitrite</b> |               |             |                |
| Order                                   | Winter-Spring | Summer-Fall | % Contribution |
| Enterobacteriales                       |               | +           | 30.86          |
| Burkholderiales                         | +             |             | 14.32          |
| Sphingomonadales                        | +             |             | 14.09          |
| Actinomycetales                         |               | +           | 10.92          |
| Rhizobiales                             | +             |             | 9.77           |
| <b>Denitrification</b>                  |               |             |                |
| Order                                   | Winter-Spring | Summer-Fall | % Contribution |
| Rhizobiales                             |               | +           | 15.34          |
| Burkholderiales                         | +             |             | 12.39          |
| Rhodobacteriales                        |               | +           | 10.92          |
| Flavobacteriales                        | +             |             | 8.72           |
| Rhodospirales                           |               | +           | 5.87           |
| <b>Ammonia Assimilation</b>             |               |             |                |
| Order                                   | Winter-Spring | Summer-Fall | % Contribution |
| Actinomycetales                         |               | +           | 25.48          |
| Rhizobiales                             | +             |             | 9.46           |
| Enterobacteriales                       |               | +           | 9.15           |
| Sphingomonadales                        | +             |             | 8.98           |
| Caulobacteriales                        |               | +           | 7.89           |

## REFERENCES

1. **Overbeek R, Begley T, Butler RM, Choudhuri JV, Chuang HY, Cohoon M, de Crecy-Lagard V, Diaz N, Disz T, Edwards R, Fonstein M, Frank ED, Gerdes S, Glass EM, Goesmann A, Hanson A, Iwata-Reuyl D, Jensen R, Jamshidi N, Krause L, Kubal M, Larsen N, Linke B, McHardy AC, Meyer F, Neuweger H, Olsen G, Olson R, Osterman A, Portnoy V, Pusch GD, Rodionov DA, Ruckert C, Steiner J, Stevens R, Thiele I, Vassieva O, Ye Y, Zagnitko O, Vonstein V.** 2005. The subsystems approach to genome annotation and its use in the project to annotate 1000 genomes. *Nucleic Acids Research* **33**:5691-5702.
2. **Kanehisa M, Goto S, Furumichi M, Tanabe M, Hirakawa M.** 2010. KEGG for representation and analysis of molecular networks involving diseases and drugs. *Nucleic Acids Res* **38**:D355-360.
3. **Prestat E, David MM, Hultman J, Tas N, Lamendella R, Dvornik J, Mackelprang R, Myrold DD, Jumpponen A, Tringe SG, Holman E, Mavromatis K, Jansson JK.** 2014. FOAM (Functional Ontology Assignments for Metagenomes): a Hidden Markov Model (HMM) database with environmental focus. *Nucleic Acids Res* **42**:e145.
